# Supplementary material for: Antiviral activity of pyrazole derivatives bearing a hydroxyquinoline scaffold against SARS-CoV-2, HCoV-229E, MERS-CoV, and IBV propagation
Source: Royal Society of Chemistry journal article supplement (doi:10.1039/d4ra04728a), 2024-01-01
Supplement: d4ra04728a1.pdf [file d4ra04728a1.pdf]

## **Antiviral Activity of Pyrazole Derivatives bearing Hydroxyquinoline Scaffold against SARS-CoV-2, HCoV-229E, MERS-CoV, and IBV Propagation**

**Alaa R. I. Morsy**<sup>1†</sup>, **Sara H. Mahmoud**<sup>2,6†</sup>, **Noura M. Abou Shama**<sup>2</sup>, **Walaa Arafa**<sup>3</sup>, **Gehad A. Yousef**<sup>1</sup>, **Ahmed. A. Khalil**<sup>4,\*</sup>, **Sayed K. Ramadan**<sup>5,\*</sup>

1. Central Laboratory for Evaluation of Veterinary Biologics (CLEVB), Agricultural Research Center, Cairo, Egypt
2. Center of Scientific Excellence for Influenza Viruses, National Research Centre (NRC), Egypt.
3. Microbiology Department, Faculty of Agriculture, Cairo University, Egypt.
4. Veterinary Sera and Vaccines Research Institute, (VSVRI), Agricultural Research Center (ARC), Cairo, Egypt
5. Chemistry Department, Faculty of Science, Ain Shams University, Cairo, 11566, Egypt
6. Current affiliation: Texas Biomedical Research Institute, Texas, USA

**† Equal contributing first authors**

**\* Correspondence: E-mail: [ahme\\_2001@hotmail.com](mailto:ahme_2001@hotmail.com) (Ahmed A. Khalil)  
[sayed.karam2008@sci.asu.edu.eg](mailto:sayed.karam2008@sci.asu.edu.eg) (Sayed K. Ramadan)**

**Supporting information:**

**Table S1.** Physicochemical Properties / Lipophilicity / Drug-likeness properties of the prepared compounds.

| <b>Compds.</b> | Molecular weight (g/mol) | Num. heavy atoms | Num. arom. heavy | Num. H-bond acceptor | Num. H-bond donors | Molar Refractivity | TPSA (Å <sup>2</sup> ) | Consensus Log P <sub>o/w</sub> | Lipinski's Rule | Bioavailability Score | GI absorption | Log K <sub>p</sub> (Skin permeation) (cm/s) |
|----------------|--------------------------|------------------|------------------|----------------------|--------------------|--------------------|------------------------|--------------------------------|-----------------|-----------------------|---------------|---------------------------------------------|
| <b>Hyd</b>     | 422.48                   | 32               | 23               | 4                    | 2                  | 124.13             | 90.01                  | 3.36                           | Yes             | 0.55                  | High          | -6.18                                       |
| <b>HQ</b>      | 577.63                   | 44               | 33               | 6                    | 2                  | 171.73             | 109.47                 | 5.50                           | Yes             | 0.55                  | Low           | -5.27                                       |
| <b>15A</b>     | 559.62                   | 43               | 33               | 5                    | 1                  | 173.52             | 83.61                  | 5.83                           | No              | 0.17                  | Low           | -4.67                                       |

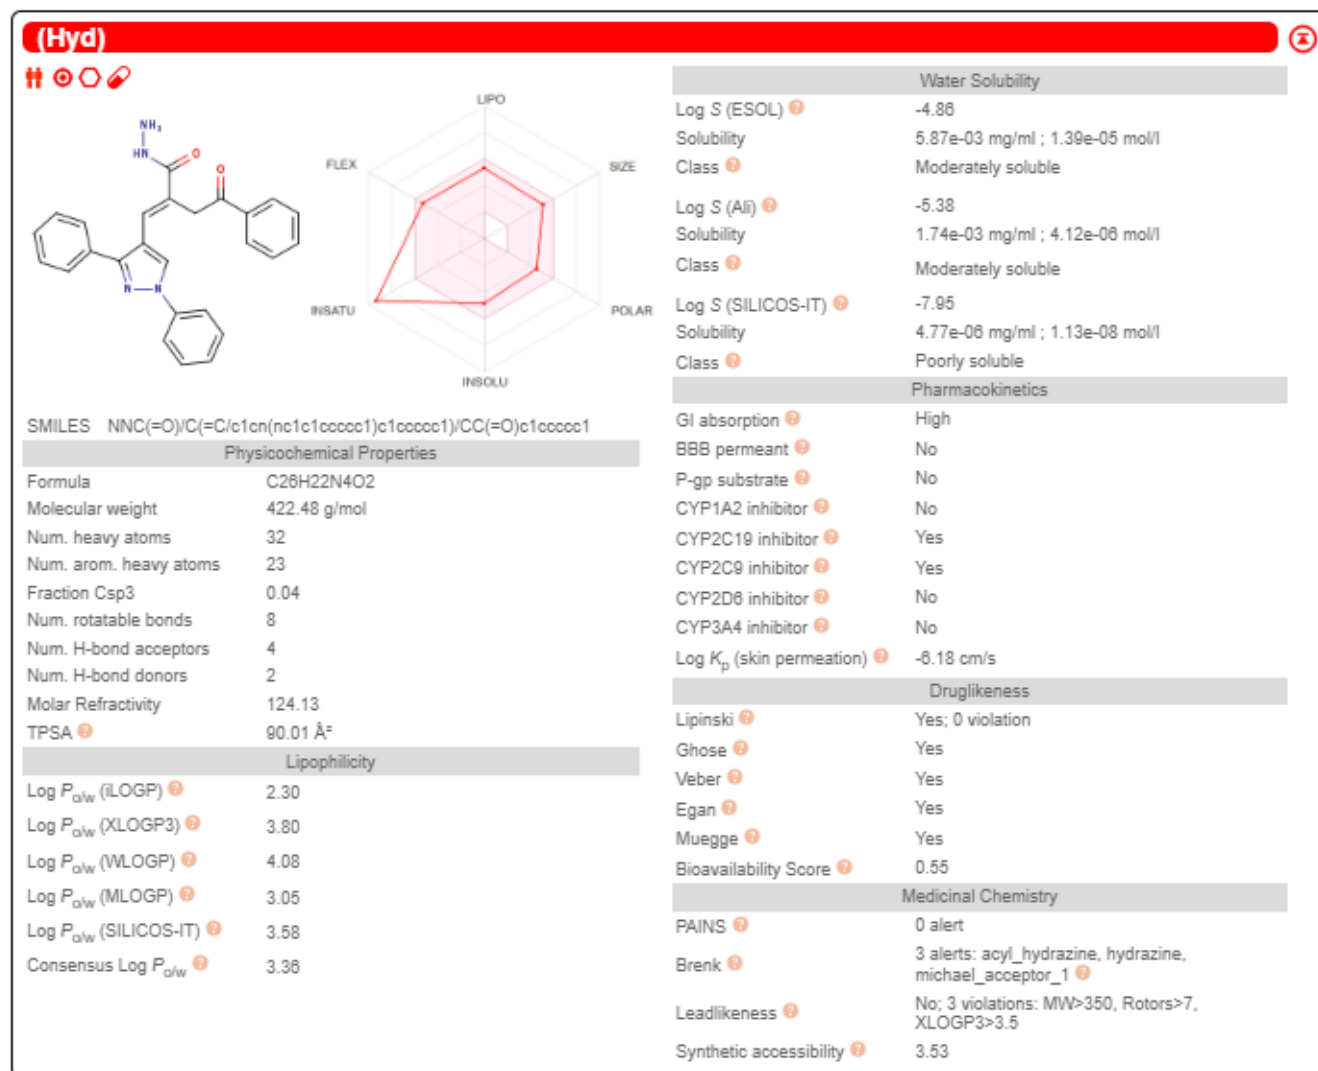

**Fig. S1.** ADME of compound **Hyd**.

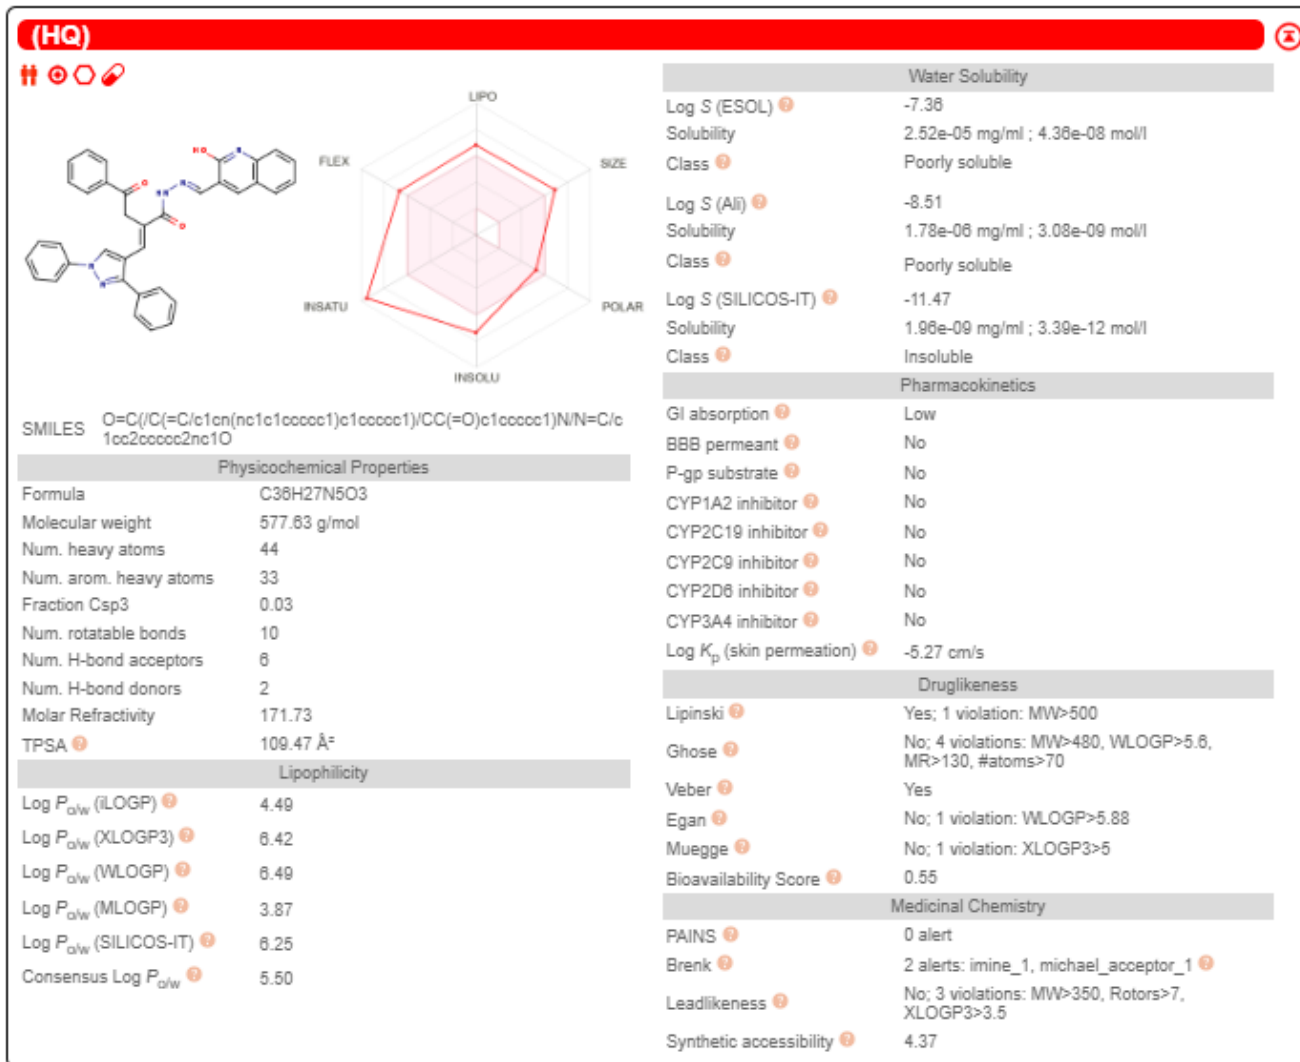

Fig. S2. ADME of compound HQ.

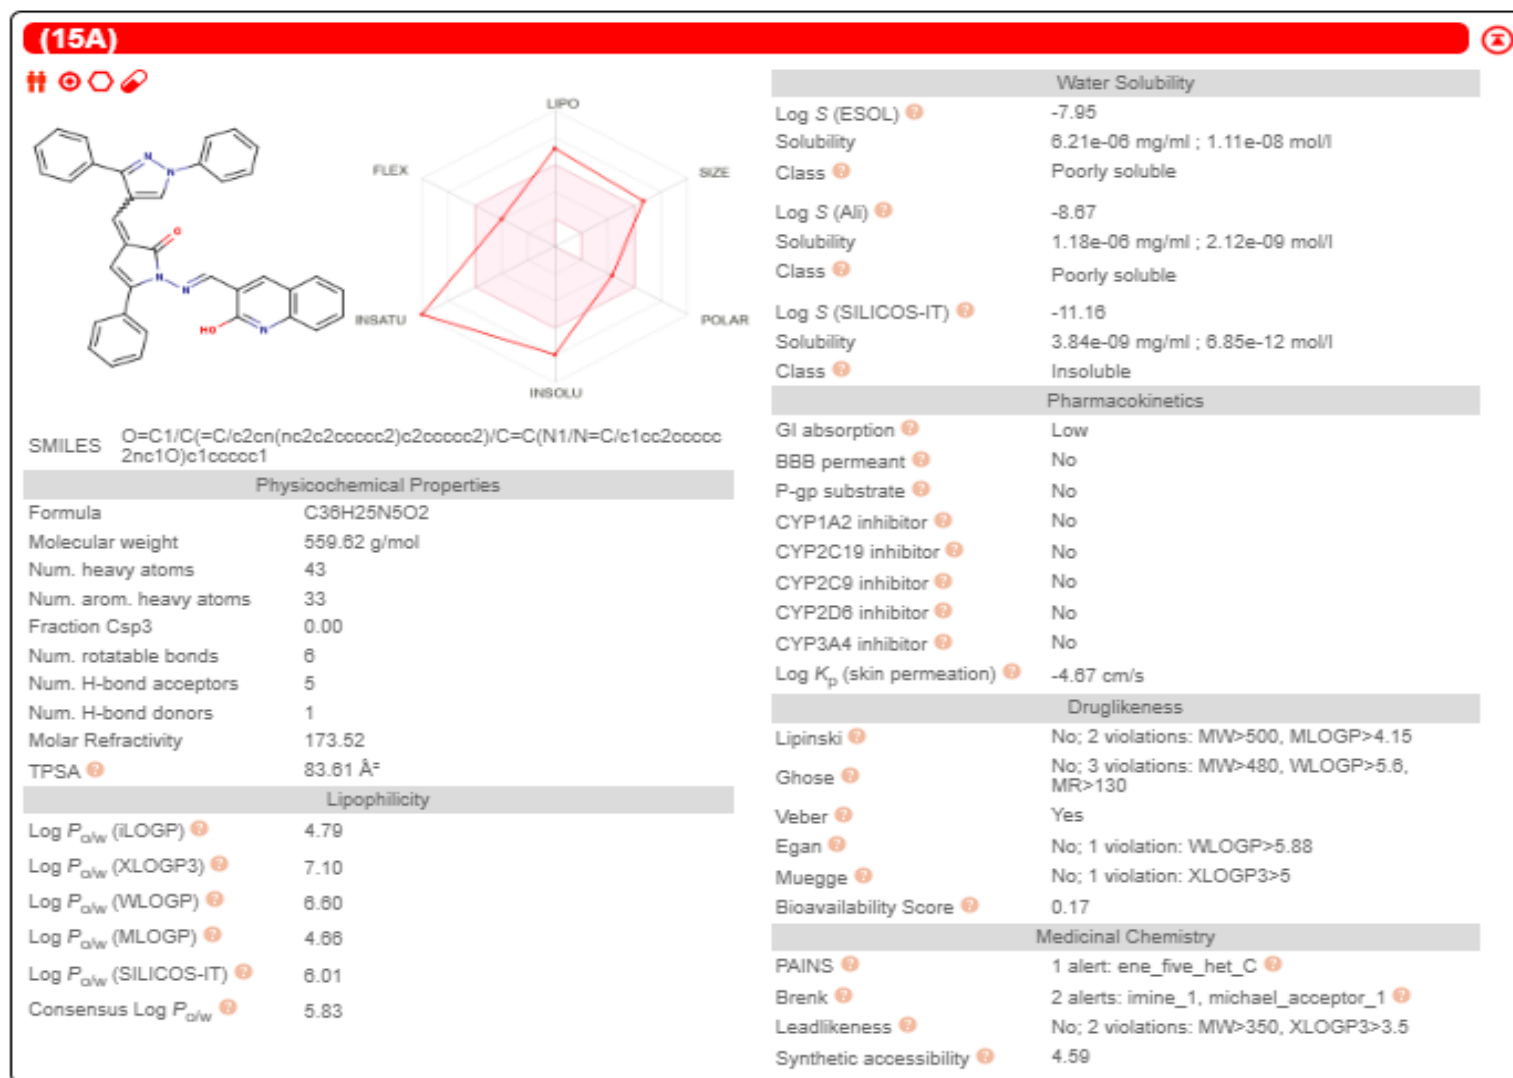

Fig. S3. ADME of compound 15A.

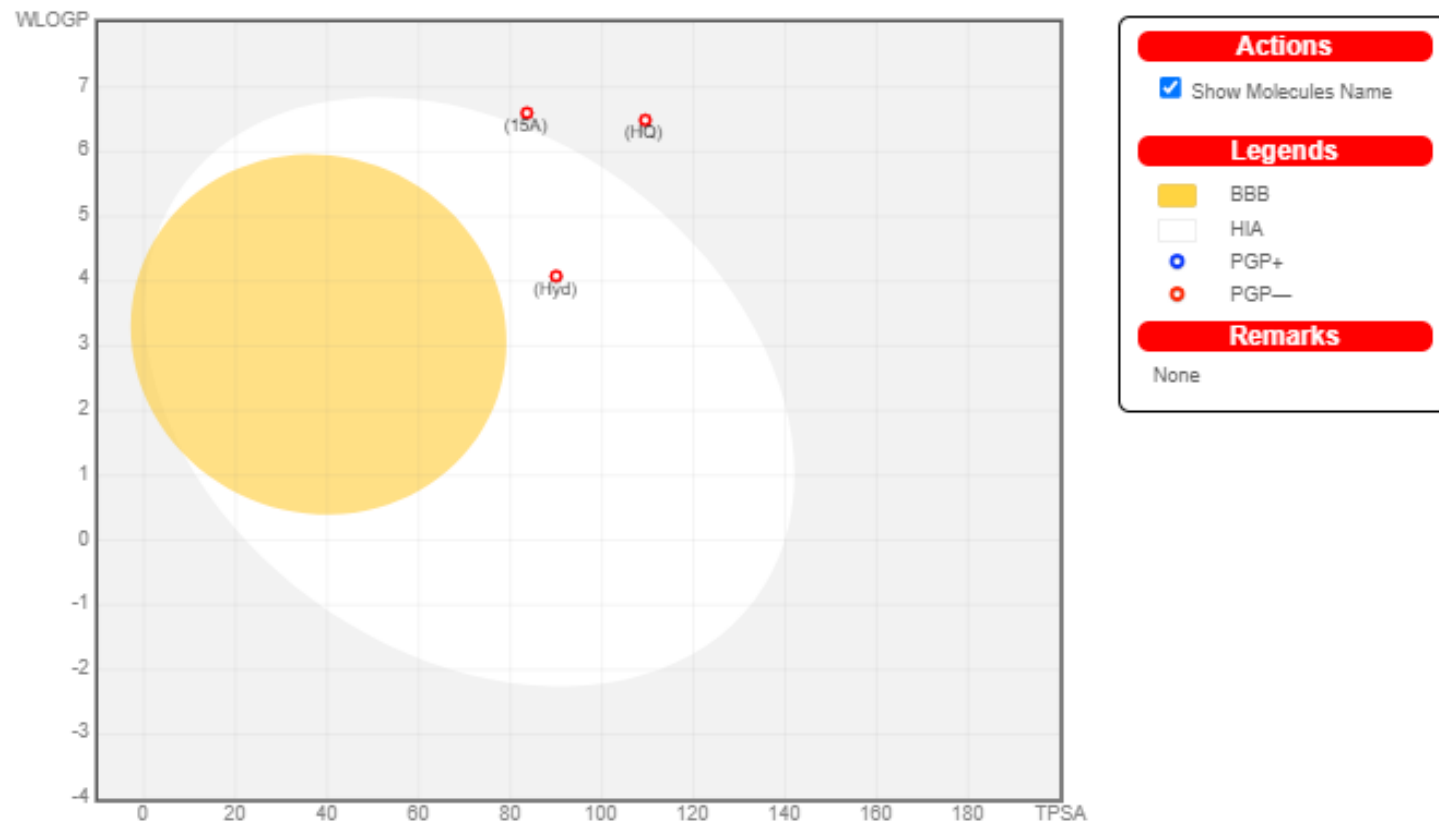

**Fig. S4.** BOILED-EGG of the synthesized compounds.

**Spectral data:**

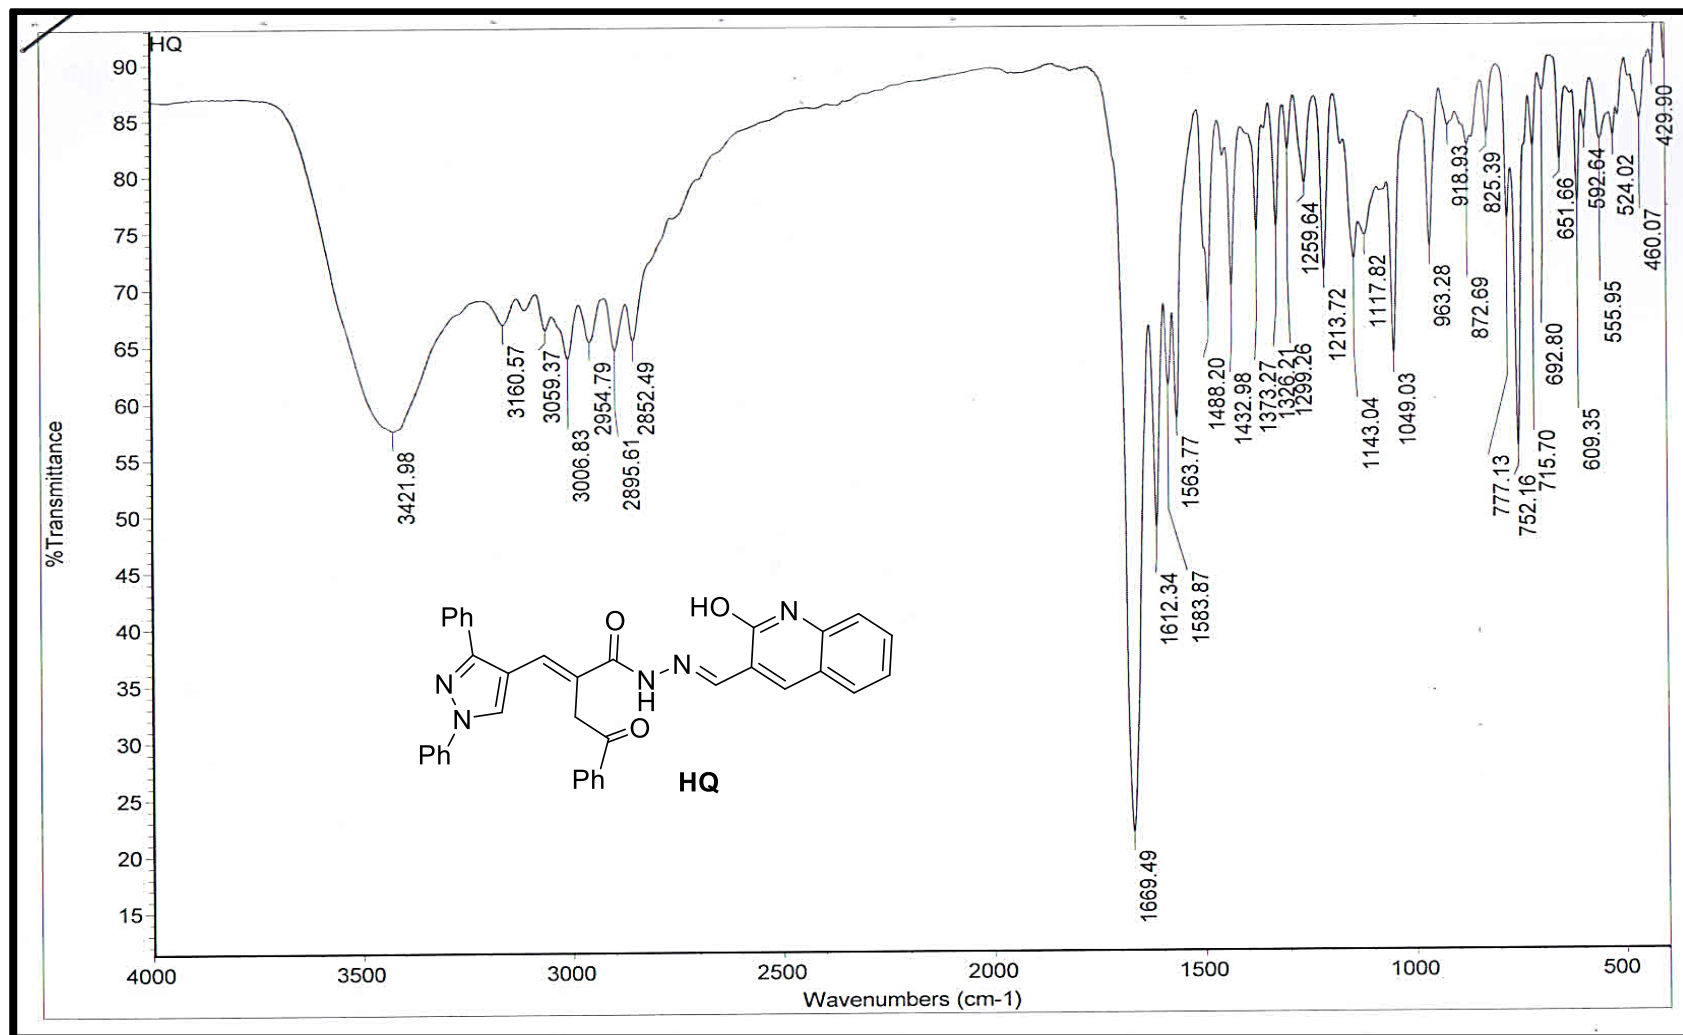

FTIR spectrum of compound **HQ**

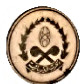

Dr\_SayedKarm-HQ

Dr\_SayedKarm-HQ

Sample Name **Dr\_SayedKarm-HQ**  
Date collected **2018-01-30**

Pulse sequence **PROTON**  
Solvent **DMSO**

Temperature **25**  
Spectrometer **nmr400-mercury400**

Study owner **vnmr1**  
Operator **vnmr1**

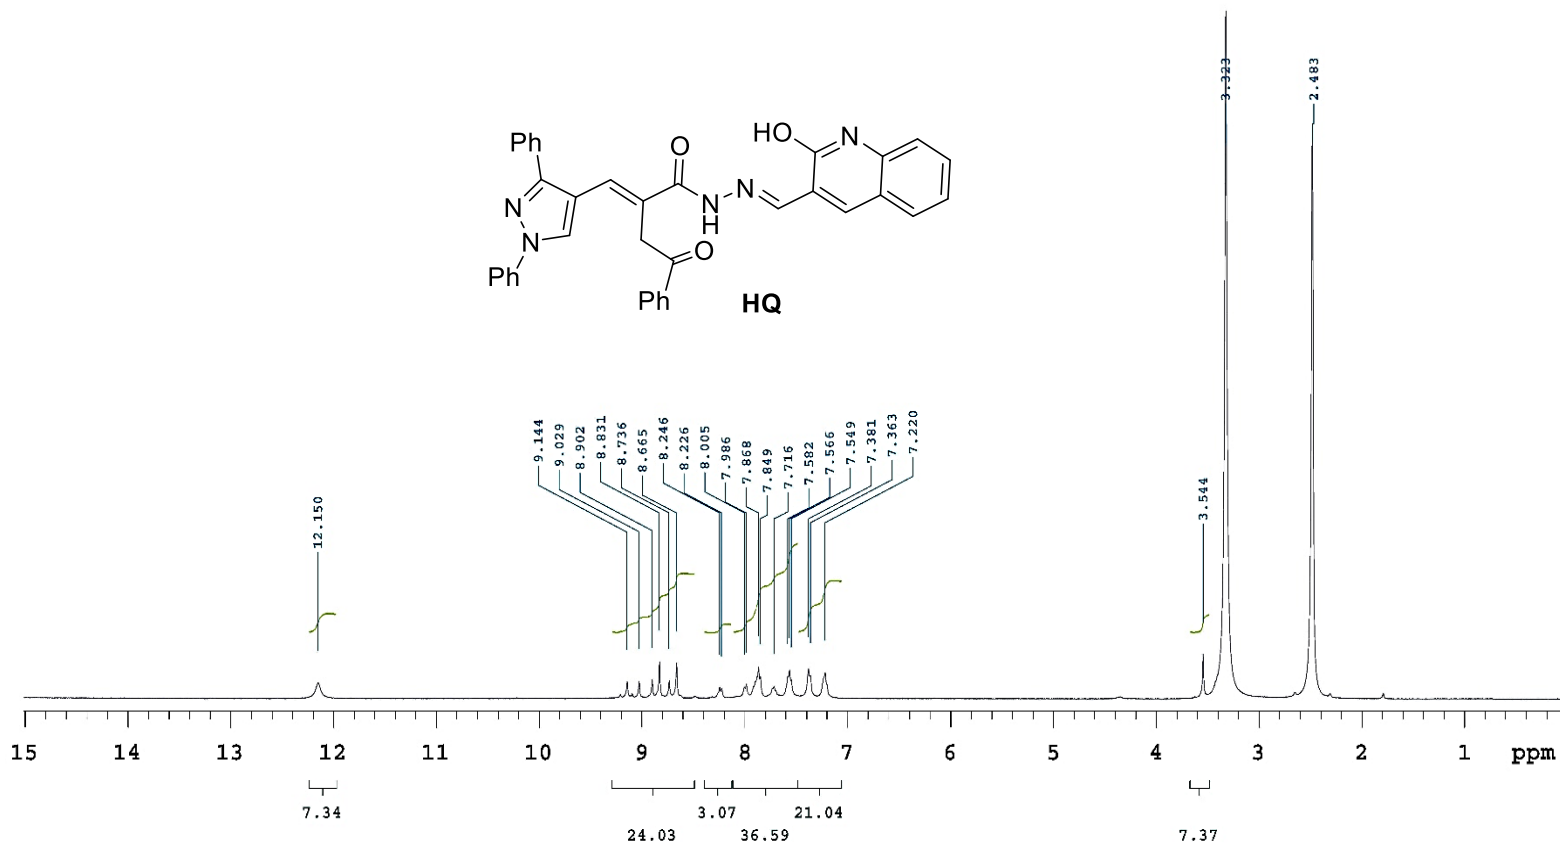

<sup>1</sup>H NMR spectrum (DMSO-*d*<sub>6</sub>) of compound **HQ**



T: {0,0} + c EI Full ms [40.00-1000.00]

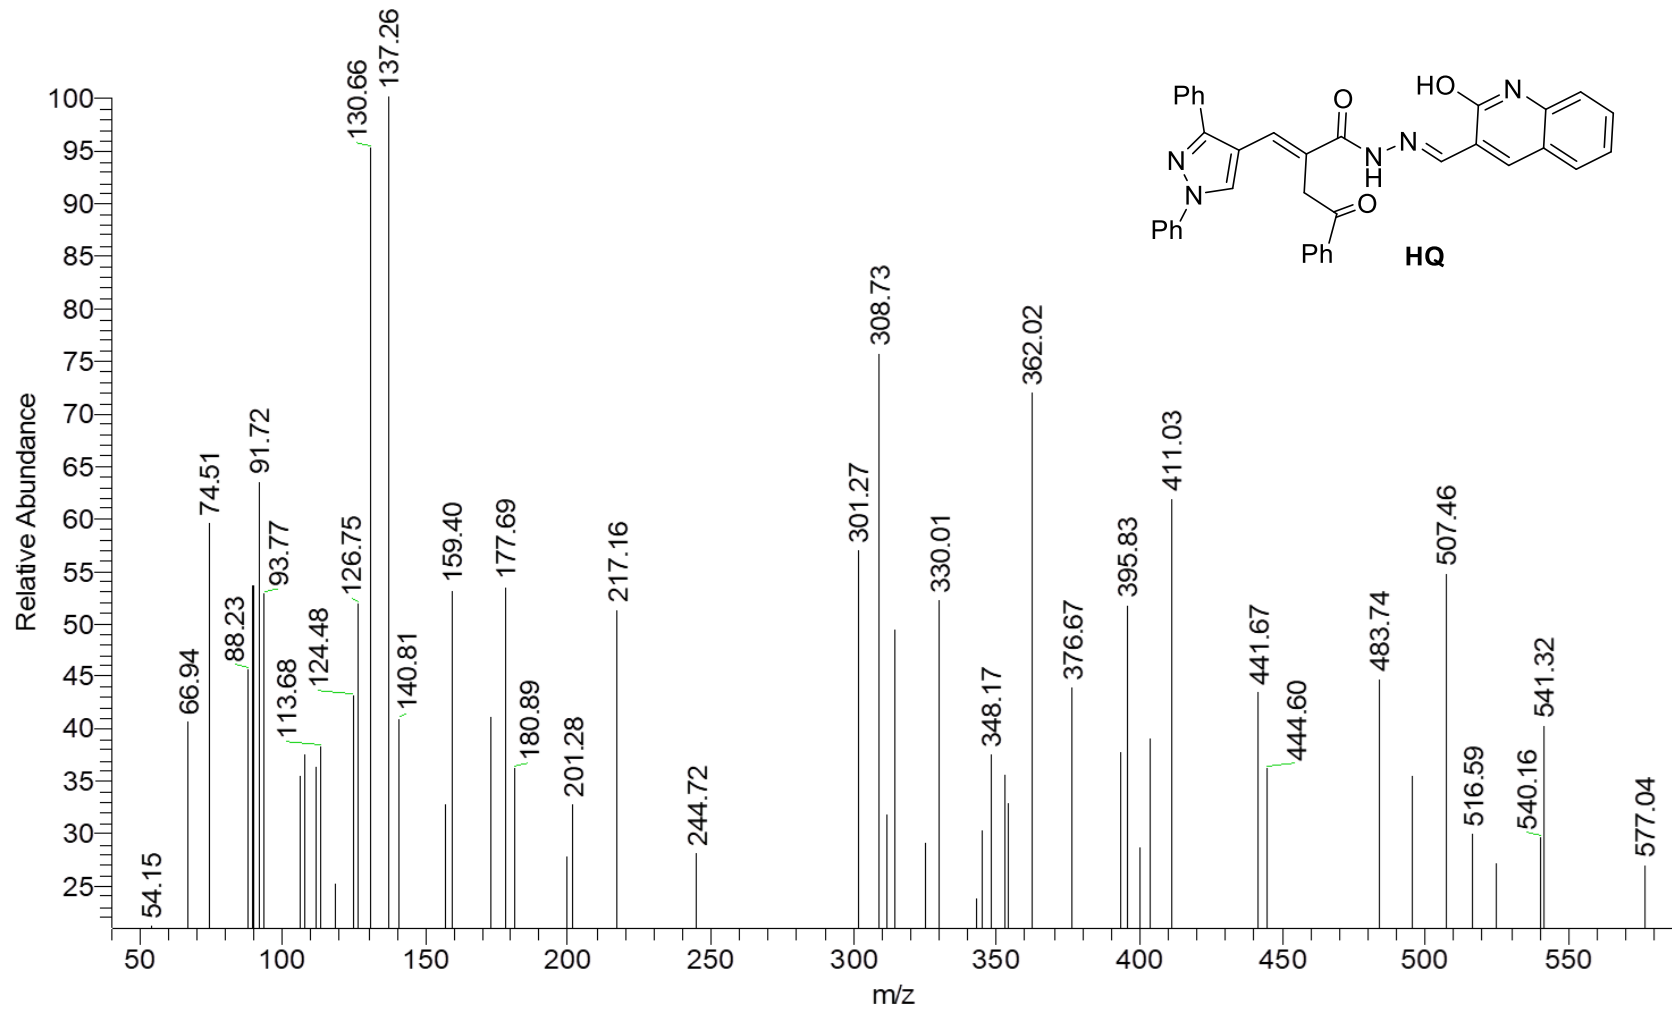

Mass spectrum of compound HQ



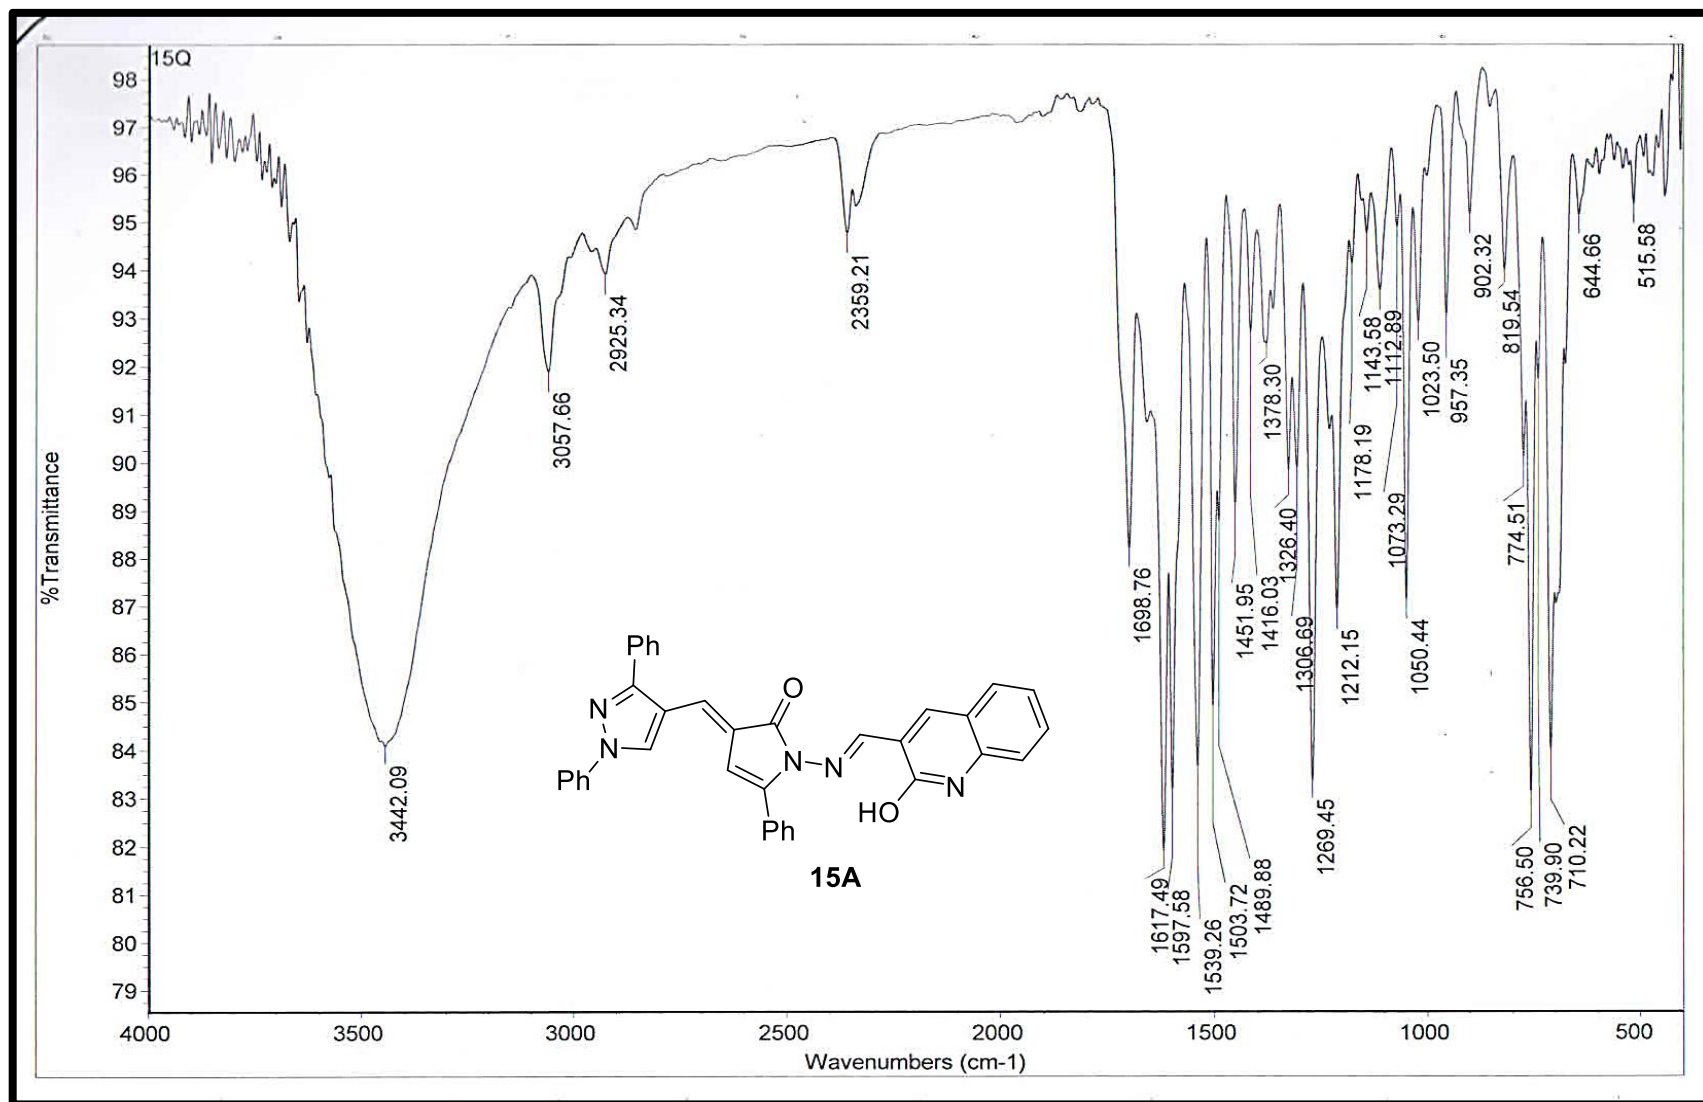

FTIR spectrum of compound 15A

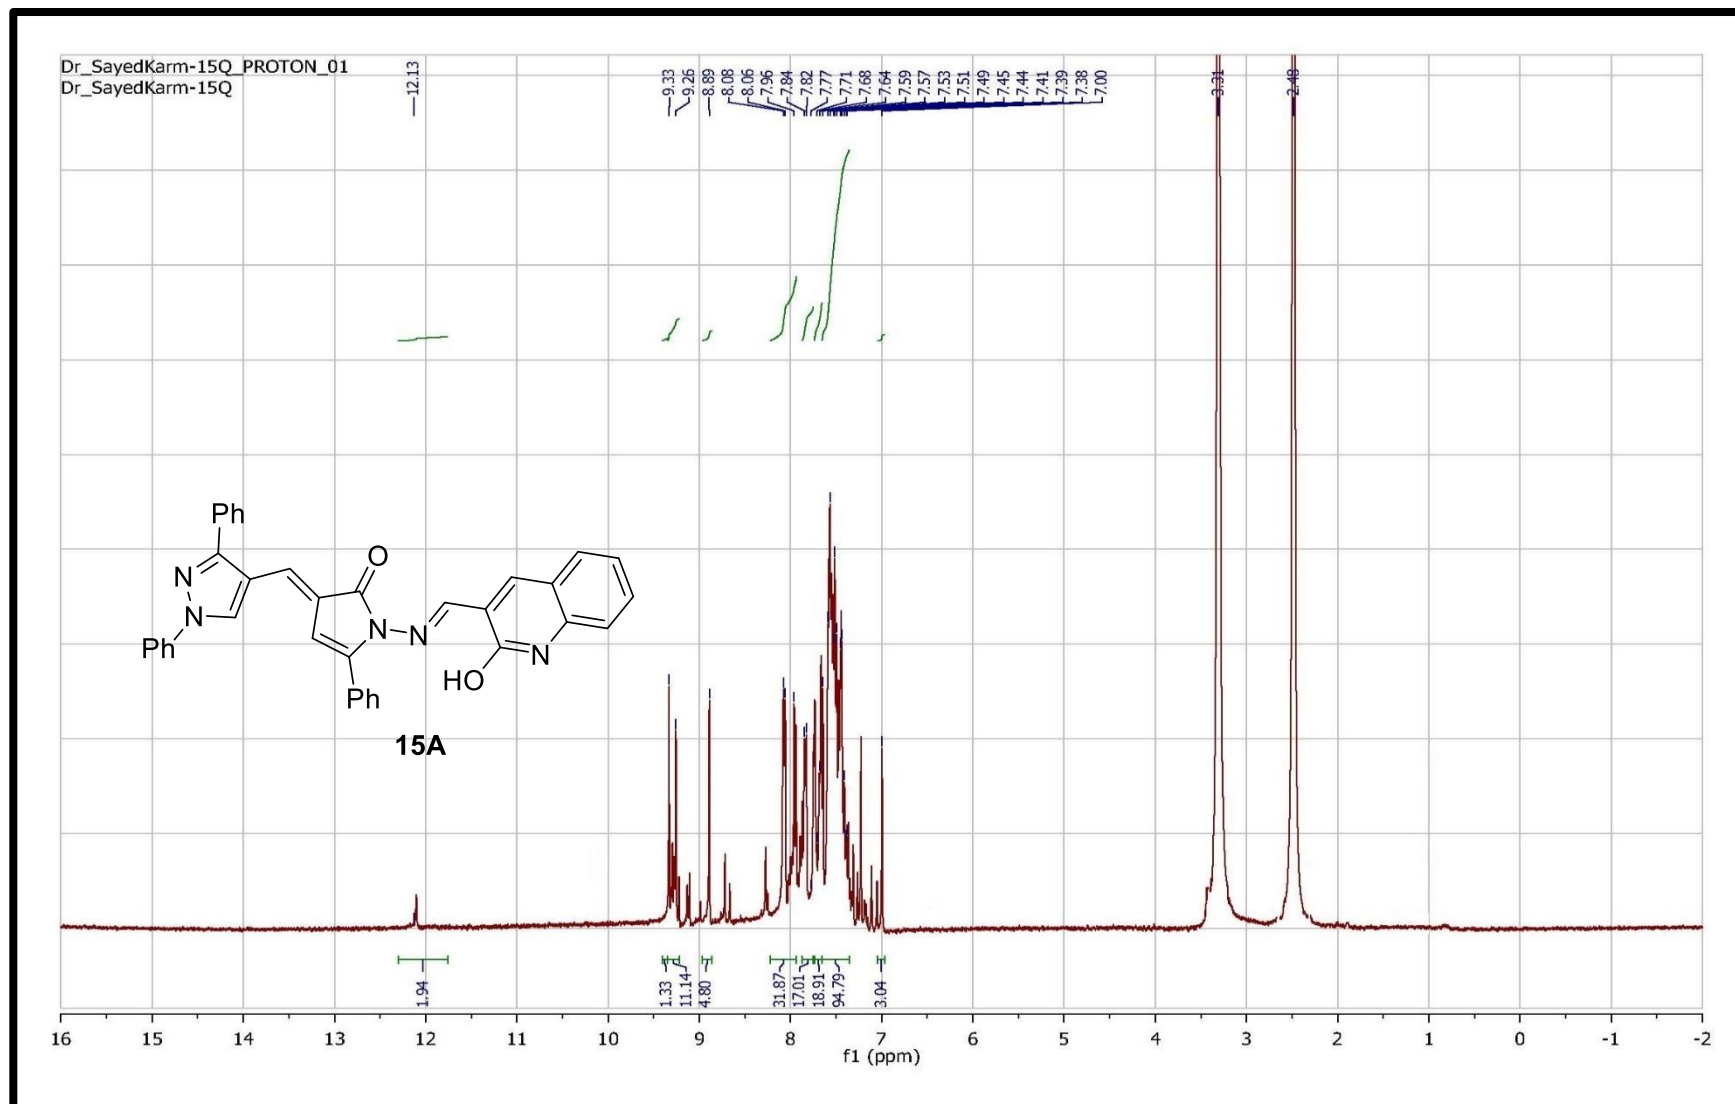

$^1\text{H}$  NMR spectrum ( $\text{DMSO-}d_6$ ) of compound **15A**

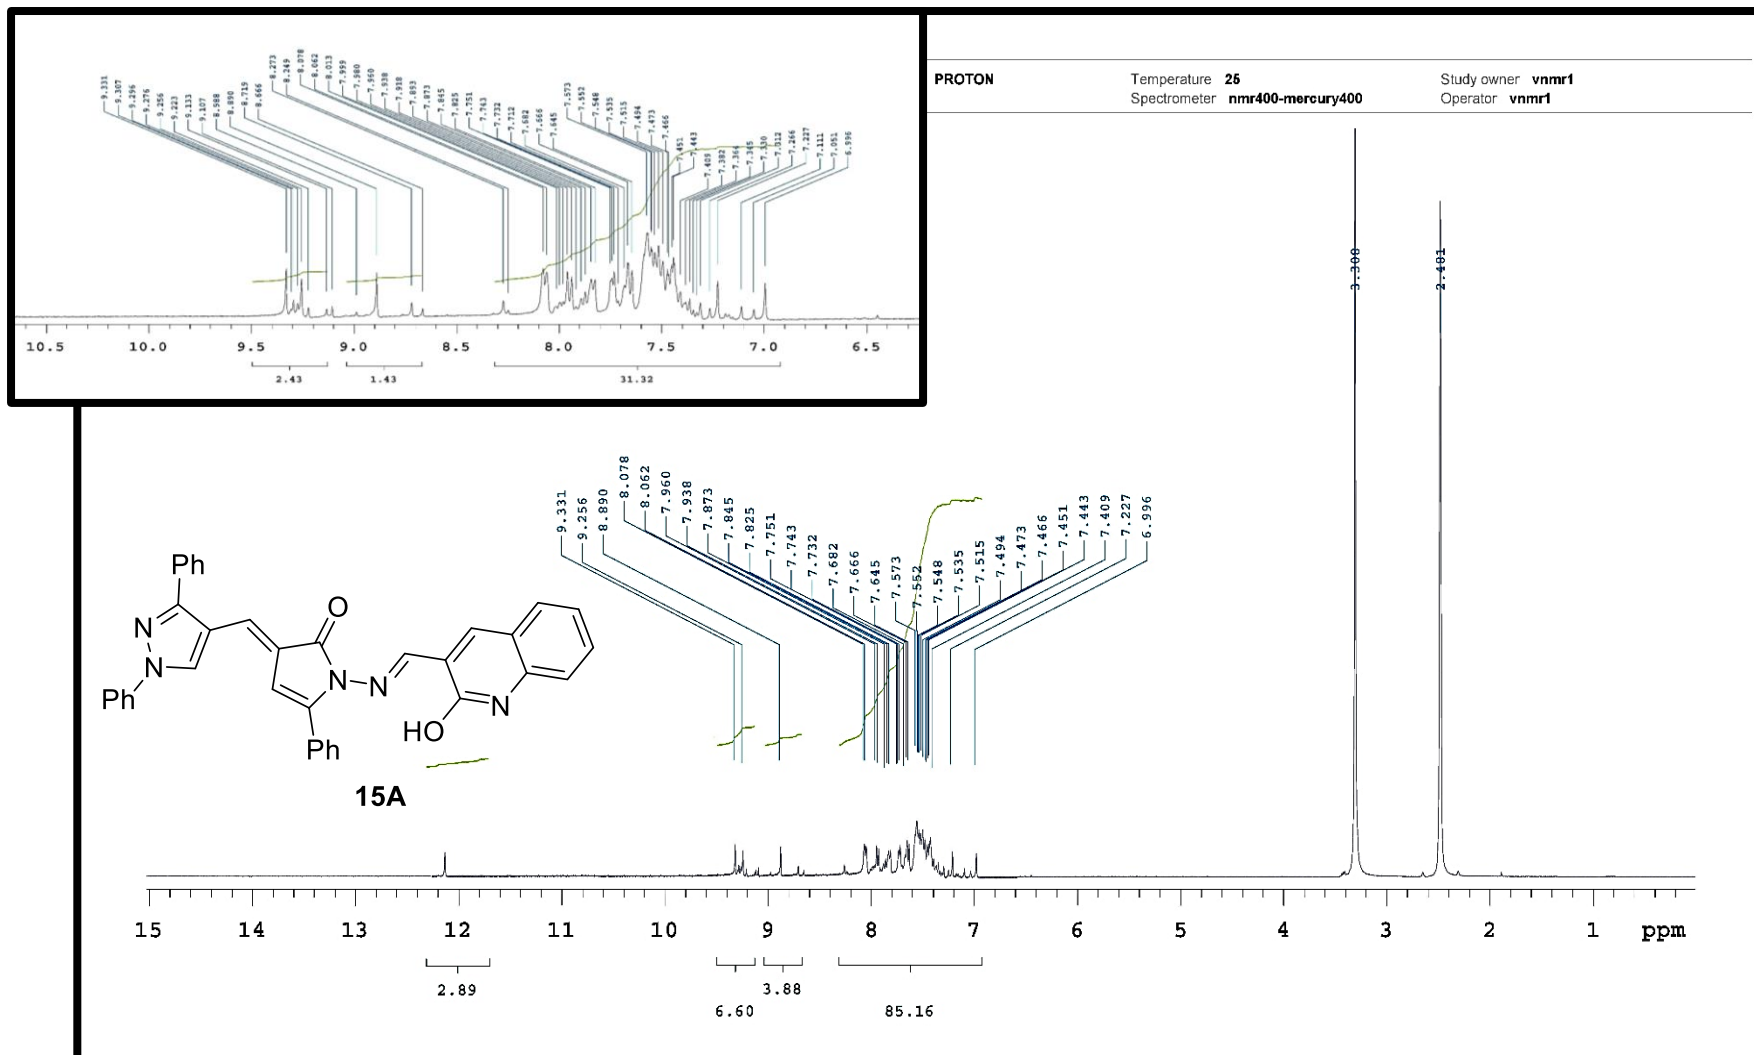

Cont.  $^1\text{H}$  NMR spectrum ( $\text{DMSO-}d_6$ ) of compound **15A**

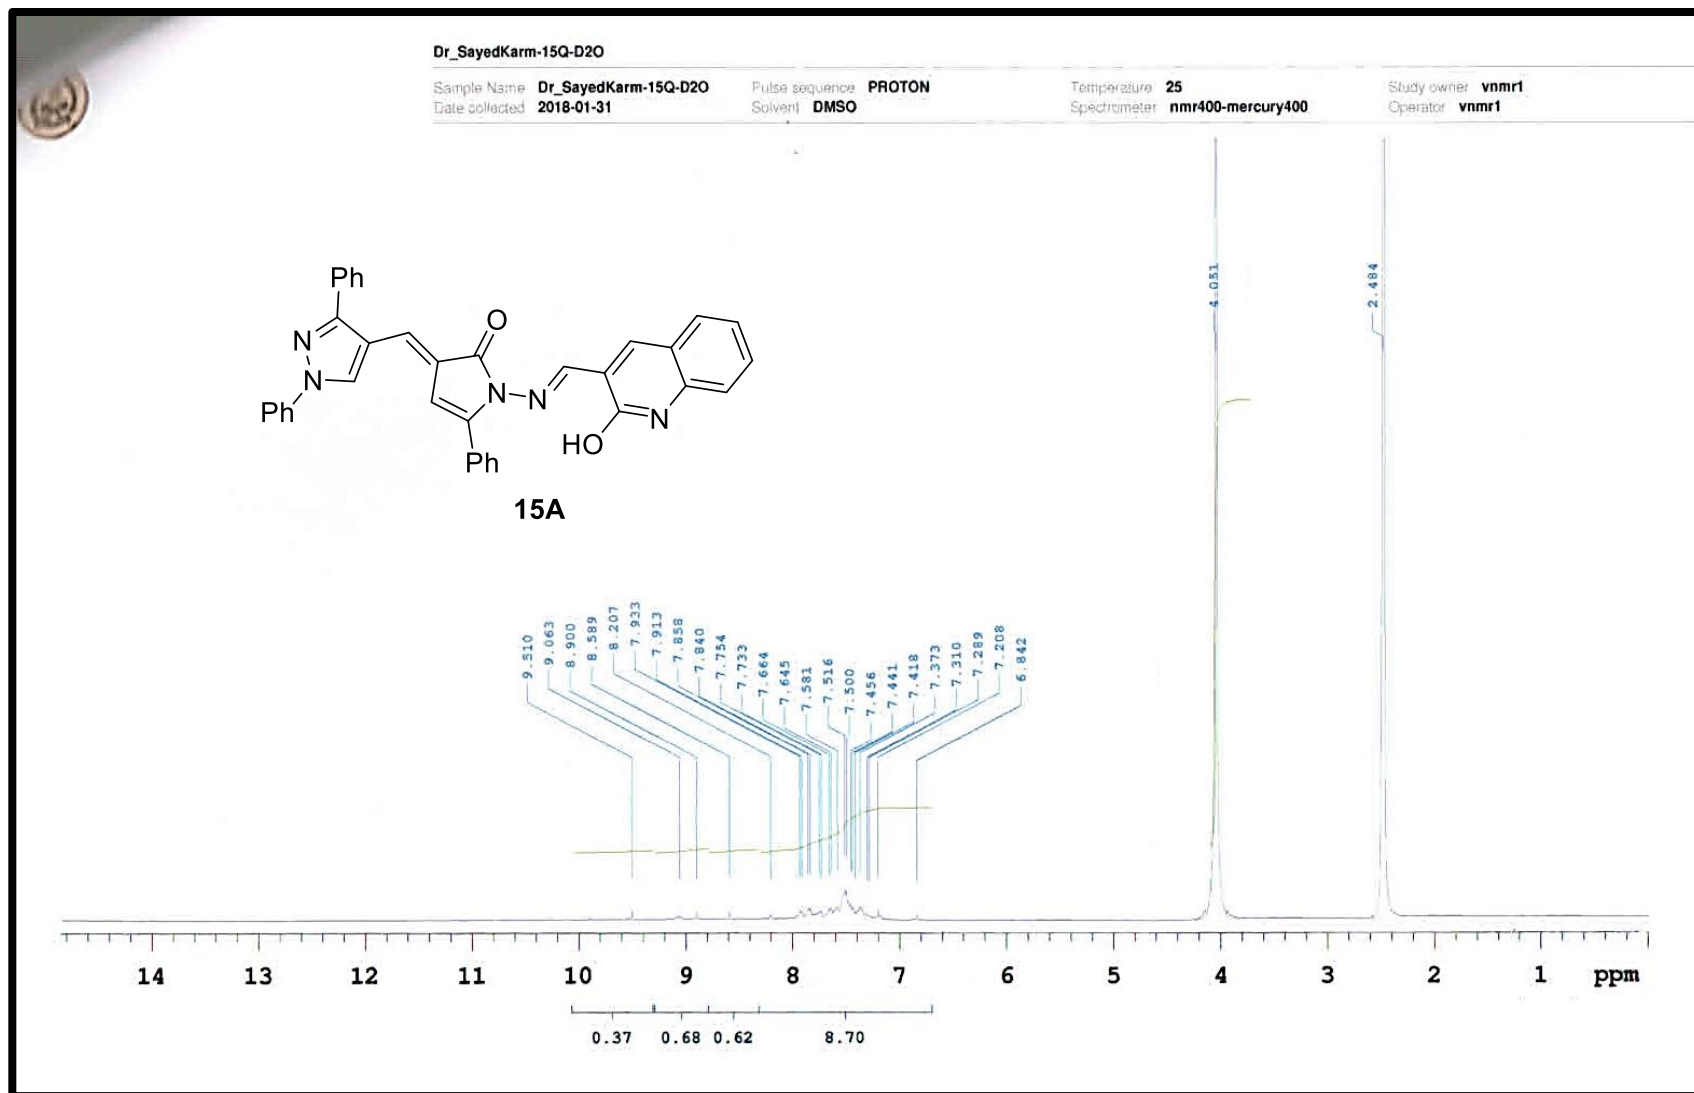

<sup>1</sup>H NMR spectrum (DMSO-*d*<sub>6</sub>+D<sub>2</sub>O) of compound 15A

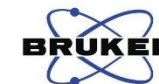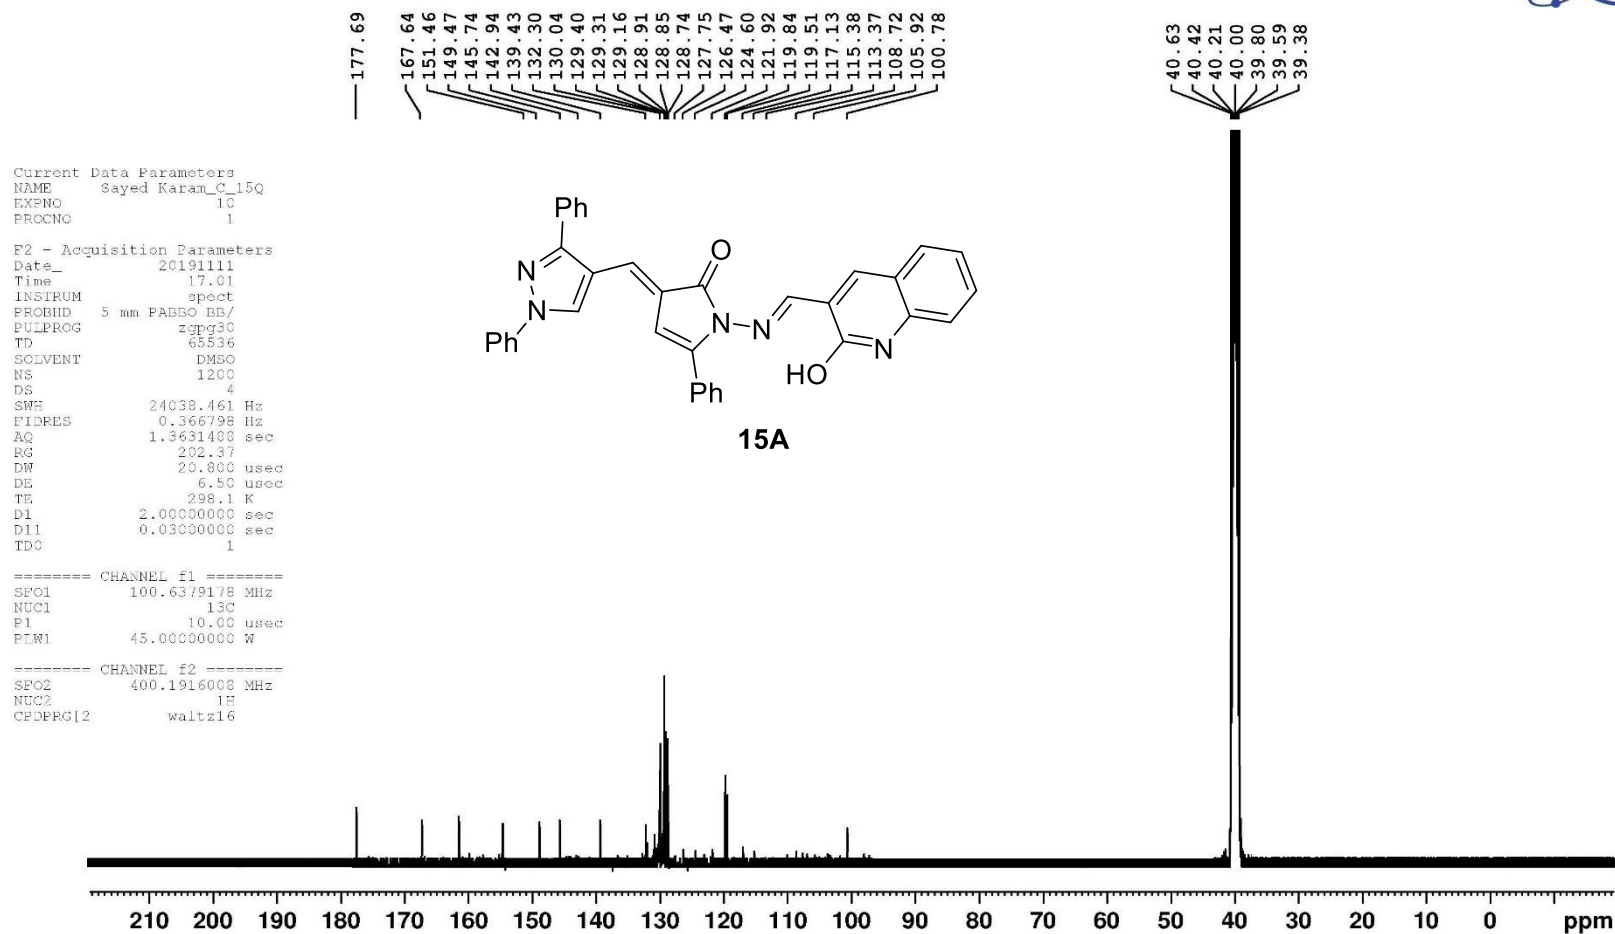<sup>13</sup>C NMR spectrum (DMSO-*d*<sub>6</sub>) of compound **15A**

T: {0,0} + c EI Full ms [40.00-1000.00]

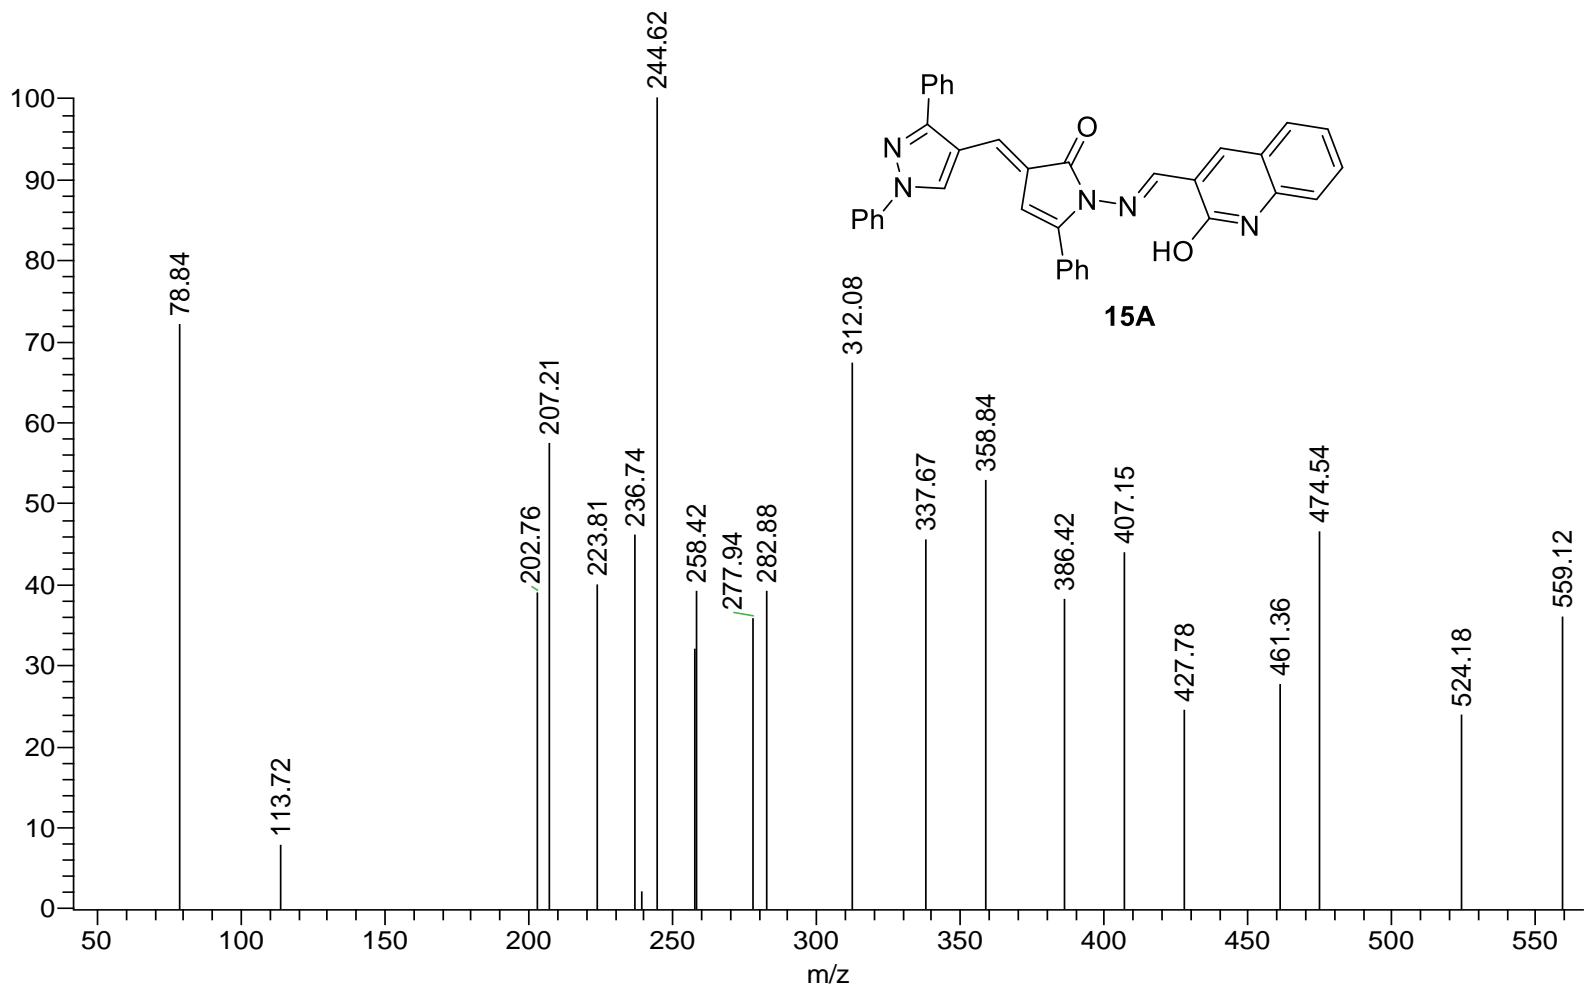

Mass spectrum of compound 15A
